# Supplementary material for: The Evolving Puzzle of AutosomalVersusY-linked Male Determination inMusca domestica
Source: Oxford University Press journal article supplement (doi:10.1534/g3.114.014795), 2015-01-02
Supplement: 014795_014795si.pdf [file 014795_014795si.pdf]

## **The Evolving Puzzle of Autosomal Versus Y-linked Male Determination in *Musca domestica***

Ronda L. Hamm\*, Richard P. Meisel<sup>†</sup> and Jeffrey G. Scott<sup>#</sup>

\*Dow AgroSciences, Indianapolis, Indiana 46268

<sup>†</sup>Department of Biology and Biochemistry, University of Houston, Houston, Texas 77204

<sup>#</sup>Department of Entomology, Comstock Hall, Cornell University, Ithaca, New York 14853

Corresponding author:

Jeffrey G. Scott

Department of Entomology

6134 Comstock Hall

Cornell University

Ithaca, NY 14853

Phone: 607-255-7340

Email: [jgs5@cornell.edu](mailto:jgs5@cornell.edu)

**DOI: 10.1534/g3.114.014795**

**Table S1 Linkage of M in laboratory strains of house fly**

| Strain (location experiments done) | Origin    | Linkage of M     | Reference                      |
|------------------------------------|-----------|------------------|--------------------------------|
| 791spin                            | Denmark   | III              | (Højland <i>et al.</i> 2014)   |
| A14-WHO                            | Turkey    | II               | (Kence and Kence 1993)         |
| aabo                               | *         | Y                | (Franco <i>et al.</i> 1982)    |
| aaby                               | *         | Y                | (Denholm <i>et al.</i> 1983)   |
| aabys                              | *         | Y <sup>^</sup>   | (Scott 1989)                   |
| Akita-f                            | Japan     | III              | (Shono and Tsukamoto 1983)     |
| ALHF (Alabama)                     | U.S.A.    | Y/X              | (Liu and Yue 2001)             |
| Ankara                             | Turkey    | III              | (Kence and Kence 1992)         |
| ASPR                               | Japan     | III              | (Shono and Scott 1990)         |
| Cooper                             | *         | Y                | (Denholm <i>et al.</i> 1983)   |
| CS                                 | U.S.A.    | III <sup>†</sup> | (Hamm <i>et al.</i> 2005)      |
| DDT resistant                      | Australia | II               | (Kerr 1970)                    |
| Gainesville                        | U.S.A.    | III              | (McDonald 1971)                |
| KS8S3                              | U.S.A.    | III              | (Kavi <i>et al.</i> 2014)      |
| LPR                                | U.S.A.    | Y <sup>^</sup>   | (Scott and Georghiou 1986)     |
| Mutant strainII                    | *         | III              | (Cakir 1999)                   |
| Mutant strainIII                   | *         | III              | (Cakir 1999)                   |
| Nagai                              | Japan     | III              | (Hiroyoshi <i>et al.</i> 1982) |
| NYSPINR (New York)                 | U.S.A.    | III              | (Shono and Scott 1990)         |
| SRS (Japan)                        | *         | V                | (Hamm <i>et al.</i> 2005)      |
| SRS (Denmark)                      | *         | III              | (Hamm 2008)                    |
| SRS (Italy)                        | *         | Y                | (Franco <i>et al.</i> 1982)    |
| Standard                           | *         | Y                | (Cakir 1999)                   |
| Wakamatsu-m                        | Japan     | V                | (Shono 1983)                   |
| WHO/IN                             | *         | Y                | (Kence and Kence 1993)         |
| YBOL                               | Japan     | III              | (Lee and Shono 1996)           |
| YPER                               | Japan     | III <sup>†</sup> | (Shono <i>et al.</i> 2002)     |

Only strains where a definitive linkage of M was found are included in this table. Strains in which M was not linked to an autosome, but for which no karyotype information are available were labeled Y/X.

\* Exact location of collection not specified.

<sup>^</sup>XY Karyotype determined by Hardstone and Scott (unpublished).

<sup>†</sup>XX Karyotype determined by Hardstone and Scott (unpublished).

#### LITERATURE CITED

- Cakir, S., 1999 Two new sex determining factors (M<sup>V</sup>, F<sup>D</sup>) in housefly, (*Musca domestica*) populations in Turkey. Turkish J. Zool. 23: 73-77.
- Denholm, I., M.G. Franco, P.G. Rubini, and M. Vecchi, 1983 Identification of a male determinant on the X chromosome of housefly (*Musca domestica* L.) populations in South-East England. Genet. Res. Camb. 42: 311-322.

- Franco, M.G., P.G. Rubini, and M. Vecchi, 1982 Sex-determinants and their distribution in various populations of *Musca domestica* L. of Western Europe. *Genet. Res. Camb.* 40: 279-293.
- Hamm, R., T. Shono, and J.G. Scott, 2005 A cline in frequency of autosomal males is not associated with insecticide resistance in house fly (Diptera: Muscidae). *J. Econ. Entomol.* 98: 171-176.
- Hamm, R.L., 2008 *Exploring the population genetics of the house fly sex determining genes, M and F* Ithaca, NY: Cornell.
- Hiroyoshi, T., Y. Fukumori, and H. Inoue, 1982 Male crossing-over and location of the male determining factor on the third chromosome in a III<sup>M</sup>-type strain of the housefly. *Jpn. J. Genet.* 57: 231-239.
- Højland, D.H., J.G. Scott, K.-M.V. Jensen, and M. Kristensen, 2014 Autosomal male determination in a spinosad resistant house fly strain from Denmark. *Pest Man. Sci.* 70: 1114-1117.
- Kavi, L.A.K., P.E. Kaufman, and J.G. Scott, 2014 Genetics and mechanisms of imidacloprid resistance in house flies. *Pestic. Biochem Physiol.* 109: 64-69.
- Kence, M., and A. Kence, 1992 Genetic consequences of linkage between malathion resistance and an autosomal male-determining factor in house fly (Diptera: Muscidae). *J. Econ. Entomol.* 85: 1566-1570.
- Kence, M., and A. Kence, 1993 Control of insecticide resistance in laboratory populations of house fly (Diptera: Muscidae) by introduction of susceptibility genes. *J. Econ. Entomol.* 86: 189-194.
- Kerr, R.W., 1970 Inheritance of DDT resistance in a laboratory colony of the housefly, *Musca Domestica*. *Aust. J. Biol. Sci.* 23: 377-400.
- Lee, S., and T. Shono, 1996 Linkage group analysis of pyraclofos resistance in the housefly, *Musca domestica* L. *Appl. Entomol. Zool.* 31: 127-134.
- Liu, N., and X. Yue, 2001 Genetics of pyrethroid resistance in a strain (ALHF) of house flies (Diptera: Muscidae). *Pestic. Biochem. Physiol.* 70: 151-158.
- McDonald, I.C., 1971 A male-producing strain of the house fly. *Science* 172: 489.
- Scott, J.G., 1989 Cross-resistance to the biological insecticide abamectin in pyrethroid resistant house flies. *Pestic. Biochem. Physiol.* 34: 27-31.
- Scott, J.G., and G.P. Georghiou, 1986 The biochemical genetics of permethrin resistance in the Learn-PyR strain of house fly. *Biochem. Genet.* 24: 25-37.
- Shono, T., 1983 Linkage group analysis of carboxylesterase in a malathion resistant strain of the housefly, *Musca domestica* L. (Diptera: Muscidae). *Appl. Ent. Zool.* 18: 407-415.
- Shono, T., S. Kasai, E. Kamiya, Y. Kono, and J.G. Scott, 2002 Genetics and mechanisms of permethrin resistance in the YPER strain of house fly. *Pestic. Biochem. Physiol.* 73: 27-36.
- Shono, T., and J.G. Scott, 1990 Autosomal sex-associated pyrethroid resistance in a strain of house fly (Diptera: Muscidae) with a male-determining factor on chromosome three. *J. Econ. Entomol.* 83: 686-689.
- Shono, T., and M. Tsukamoto, 1983 Linkage group analysis of fenitrothion resistance in the housefly, *Musca domestica* L. (Diptera: Muscidae). *App. Ent. Zool.* 18: 98-105.
